# Supplementary material for: High-throughput calculation for the screening of formamidinium halide perovskite for solar cells
Source: Royal Society of Chemistry journal article supplement (doi:10.1039/d4cp00980k), 2024-01-01
Supplement: d4cp00980k1.pdf [file d4cp00980k1.pdf]

Supporting Information

**High-throughput calculation for screening of For  
mamidinium Halide Perovskite for Solar Cells**

Tomoya Tashiro†, Hajime Suzuki† and Keisuke Takahashi†\*

†Department of Chemistry, Hokkaido University, North 10, West 8, Sapporo 060-8510, Japan

\*Corresponding Author:

E-mail: [tt\\_hokudai7613@eis.hokudai.ac.jp](mailto:tt_hokudai7613@eis.hokudai.ac.jp); [keisuke.takahashi@sci.hokudai.ac.jp](mailto:keisuke.takahashi@sci.hokudai.ac.jp)

| configuration | Energy   | lattice_constant | Total_magnetic_moment | Eks(PBEsol)                   | Dxc      | Eks+Dxc(GLLB-sc) | formation E | Tolerance Factor | Latticedistortion |
|---------------|----------|------------------|-----------------------|-------------------------------|----------|------------------|-------------|------------------|-------------------|
| FAGeFFF       | -65.9525 | 5.991047111      | 0                     | 4.57215895                    | 1.925091 | 6.497250311      | -0.92239155 | 1.170323 >1      | 26.8282 >15%      |
| FAGeFFCI      | -64.5513 | 5.991047111      | 0                     | 4.25484617                    | 1.726425 | 5.981270745      | -0.82015789 | 1.133308 >1      | 18.70276 >15%     |
| FAGeFFBr      | -64.1086 | 6.043370667      | 0                     | 3.80716072                    | 1.521043 | 5.328203259      | -0.80724549 | 1.123795 >1      | 19.96732 >15%     |
| FAGeFFI       | -63.6683 | 6.043370667      | 0                     | 2.62816631                    | 0.99674  | 3.624906254      | -0.78655595 | 1.109426 >1      | 17.71656 >15%     |
| FAGeFCIF      | -63.0576 | 6.043370667      | 0                     | did not converge in band calc |          |                  | -0.69568733 | 1.133308 >1      | 12.31528          |
| FAGeFCICI     | -62.4702 | 6.043370667      | 0                     | 3.45413975                    | 1.418452 | 4.872591682      | -0.66127109 | 1.101771 >1      | 20.44091 >15%     |
| FAGeFCIBr     | -62.1554 | 6.043370667      | 0                     | 3.08983128                    | 1.258273 | 4.348104408      | -0.65901786 | 1.0936 >1        | 14.91361          |
| FAGeFCII      | -61.8697 | 6.095694222      | 0                     | 2.23861305                    | 0.874577 | 3.113190083      | -0.651212   | 1.081207 >1      | 13.57603          |
| FAGeFBrF      | -62.5292 | 6.043370667      | 0                     | 3.71564004                    | 1.654109 | 5.369748676      | -0.67563057 | 1.123795 >1      | 14.33071          |
| FAGeFBrCl     | -61.9236 | 6.043370667      | 0                     | 3.17266647                    | 1.328219 | 4.500885166      | -0.63969728 | 1.0936 >1        | 17.4831 >15%      |
| FAGeFBrBr     | -61.7318 | 6.095694222      | 0                     | 2.76578753                    | 1.13788  | 3.90366772       | -0.64768985 | 1.08576 >1       | 11.39663          |
| FAGeFBrI      | -61.3271 | 6.095694222      | 0                     | 2.15716497                    | 0.860867 | 3.018032391      | -0.6299709  | 1.073858 >1      | 11.68735          |
| FAGeFIIF      | -61.8875 | 6.095694222      | 0                     | 2.79367881                    | 1.186026 | 3.97970504       | -0.63815628 | 1.109426 >1      | 11.64653          |
| FAGeFICI      | -61.4079 | 6.095694222      | 0                     | 2.35378268                    | 0.940285 | 3.294068178      | -0.61272732 | 1.081207 >1      | 14.68406          |
| FAGeFIBr      | -61.1615 | 6.095694222      | 0                     | 2.14475964                    | 0.851585 | 2.996344238      | -0.61616572 | 1.073858 >1      | 10.617            |
| FAGeFII       | -60.8165 | 6.095694222      | 0                     | 1.66932986                    | 0.662672 | 2.332001692      | -0.60342167 | 1.06268 >1       | 13.16293          |
| FAGeCIFF      | -63.1223 | 6.043370667      | 0                     | 4.02616338                    | 1.718897 | 5.745060656      | -0.70107379 | 1.133308 >1      | 17.52322 >15%     |
| FAGeCIFCI     | -62.5715 | 6.043370667      | 0                     | 3.51784397                    | 1.428874 | 4.946717695      | -0.66971217 | 1.101771 >1      | 17.2934 >15%      |
| FAGeCIFBr     | -62.2895 | 6.043370667      | 0                     | 3.07962331                    | 1.232042 | 4.31166487       | -0.67018874 | 1.0936 >1        | 17.39117 >15%     |
| FAGeCIFI      | -61.8514 | 6.095694222      | 0                     | 2.27298509                    | 0.888944 | 3.161929112      | -0.64968232 | 1.081207 >1      | 17.89879 >15%     |
| FAGeCICIF     | -61.1191 | 6.043370667      | 0                     | 3.63714547                    | 1.597526 | 5.234671696      | -0.54868058 | 1.101771 >1      | 10.78679          |
| FAGeCICICI    | -60.5295 | 6.148017778      | 0                     | 3.07225628                    | 1.297442 | 4.369698115      | -0.51408833 | 1.07458 >1       | 12.30014          |
| FAGeCICIBr    | -60.1535 | 6.148017778      | 0                     | 2.59773575                    | 1.084041 | 3.681776252      | -0.50672502 | 1.067486 >1      | 10.40902          |
| FAGeCICII     | -59.8498 | 6.148017778      | 0                     | 1.97778079                    | 0.80241  | 2.780191147      | -0.49742604 | 1.056688 >1      | 10.65554          |
| FAGeCIBrF     | -60.5103 | 6.095694222      | 0                     | 3.2957087                     | 1.46443  | 4.76013833       | -0.52192102 | 1.0936 >1        | 8.453156          |
| FAGeCIBrCl    | -59.8873 | 6.148017778      | 0                     | 2.83430529                    | 1.215323 | 4.049628545      | -0.48453988 | 1.067486 >1      | 8.884469          |
| FAGeCIBrBr    | -59.6623 | 6.148017778      | 0                     | 2.47504549                    | 1.050252 | 3.525297121      | -0.48976429 | 1.06066 >1       | 8.944563          |
| FAGeCIBrI     | -59.3595 | 6.148017778      | 0                     | 1.8473628                     | 0.758527 | 2.605889964      | -0.48053631 | 1.050262 >1      | 8.050828          |
| FAGeCIIF      | -59.9397 | 6.095694222      | 0                     | 2.55688792                    | 1.172459 | 3.729347295      | -0.49037783 | 1.081207 >1      | 12.88515          |
| FAGeCIICI     | -59.3267 | 6.148017778      | 0                     | 2.25294961                    | 0.993215 | 3.246164707      | -0.45383086 | 1.056688 >1      | 10.31684          |
| FAGeCIIBr     | -59.0983 | 6.148017778      | 0                     | 1.95164227                    | 0.850881 | 2.802523747      | -0.45876915 | 1.050262 >1      | 9.741946          |
| FAGeCIII      | -58.8206 | 6.148017778      | 0                     | 1.54997036                    | 0.656542 | 2.206511897      | -0.45163295 | 1.040457 >1      | 8.966114          |
| FAGeBrFF      | -62.6307 | 6.043370667      | 0                     | 3.65168353                    | 1.558246 | 5.209929382      | -0.68408615 | 1.123795 >1      | 18.20963 >15%     |
| FAGeBrFCI     | -62.1233 | 6.043370667      | 0                     | 3.24311943                    | 1.321268 | 4.564387911      | -0.65633864 | 1.0936 >1        | 17.2265 >15%      |
| FAGeBrFBr     | -61.5973 | 6.095694222      | 0                     | 2.88108794                    | 1.18271  | 4.063798341      | -0.63647952 | 1.08576 >1       | 17.5389 >15%      |
| FAGeBrFI      | -61.3994 | 6.095694222      | 0                     | 2.11260519                    | 0.834046 | 2.946650688      | -0.63599024 | 1.073858 >1      | 17.37671 >15%     |
| FAGeBrCIF     | -60.5715 | 6.095694222      | 0                     | did not converge in band calc |          |                  | -0.5270204  | 1.0936 >1        | 12.8963           |
| FAGeBrCICI    | -59.8887 | 6.148017778      | 0                     | 2.8086692                     | 1.197053 | 4.005722225      | -0.48465945 | 1.067486 >1      | 10.11289          |
| FAGeBrClBr    | -59.7197 | 6.148017778      | 0                     | 2.54627509                    | 1.074339 | 3.620614237      | -0.49455331 | 1.06066 >1       | 10.98962          |
| FAGeBrCII     | -59.3556 | 6.148017778      | 0                     | 1.81714204                    | 0.744174 | 2.561316098      | -0.48021303 | 1.050262 >1      | 9.038073          |
| FAGeBrBrF     | -60.0017 | 6.095694222      | 0                     | 3.05180768                    | 1.365302 | 4.417109705      | -0.50351028 | 1.08576 >1       | 8.141378          |
| FAGeBrBrCl    | -59.3824 | 6.148017778      | 0                     | 2.67521175                    | 1.160439 | 3.835650247      | -0.46644104 | 1.06066 >1       | 8.423892          |
| FAGeBrBrBr    | -59.1531 | 6.148017778      | 0                     | 2.26339613                    | 0.968256 | 3.231652603      | -0.47131203 | 1.054089 >1      | 7.871692          |
| FAGeBrBrI     | -58.8671 | 6.148017778      | 0                     | 1.73417435                    | 0.720505 | 2.454678856      | -0.46348054 | 1.044067 >1      | 7.316191          |
| FAGeBrIF      | -59.4299 | 6.095694222      | 0                     | 2.4121263                     | 1.119997 | 3.532123643      | -0.47186636 | 1.073858 >1      | 9.995035          |
| FAGeBrICI     | -58.8092 | 6.148017778      | 0                     | 2.10465092                    | 0.938133 | 3.042784411      | -0.43468219 | 1.050262 >1      | 8.265333          |
| FAGeBrIBr     | -58.5925 | 6.148017778      | 0                     | 1.82903225                    | 0.80926  | 2.638292308      | -0.44059316 | 1.044067 >1      | 7.406314          |
| FAGeBrIII     | -58.2924 | 6.200341333      | 0                     | 1.52909311                    | 0.661881 | 2.190973931      | -0.4315966  | 1.034609 >1      | 7.045773          |
| FAGelFF       | -62.6361 | 6.095694222      | 0                     | 2.6525085                     | 1.163379 | 3.81588752       | -0.7005368  | 1.109426 >1      | 20.04695 >15%     |
| FAGelFCI      | -61.5795 | 6.095694222      | 0                     | 2.468717                      | 1.01828  | 3.486996557      | -0.62702449 | 1.081207 >1      | 18.98631 >15%     |
| FAGelFBr      | -61.266  | 6.095694222      | 0                     | 2.2041841                     | 0.904133 | 3.10831691       | -0.62487257 | 1.073858 >1      | 17.31838 >15%     |
| FAGelFI       | -60.8632 | 6.095694222      | 0                     | 1.69661278                    | 0.68013  | 2.376742442      | -0.59130695 | 1.06268 >1       | 14.26956          |
| FAGelCIF      | -59.9795 | 6.095694222      | 0                     | 2.56332672                    | 1.135565 | 3.698976702      | -0.49369058 | 1.081207 >1      | 12.36022          |
| FAGelCICI     | -59.4583 | 6.148017778      | 0                     | 2.30160917                    | 0.98622  | 3.287829297      | -0.46479497 | 1.056688 >1      | 12.23838          |
| FAGelCIBr     | -59.1064 | 6.148017778      | 0                     | 1.90452228                    | 0.814701 | 2.719223743      | -0.4594517  | 1.050262 >1      | 8.533982          |
| FAGelCII      | -58.8182 | 6.148017778      | 0                     | 1.49446809                    | 0.625122 | 2.119589732      | -0.45143945 | 1.040457 >1      | 7.941962          |
| FAGelBrF      | -59.417  | 6.095694222      | 0                     | 2.41739584                    | 1.096622 | 3.514017946      | -0.47079112 | 1.073858 >1      | 7.293733          |
| FAGelBrCl     | -58.8107 | 6.148017778      | 0                     | 2.09444866                    | 0.917529 | 3.011977524      | -0.43480516 | 1.050262 >1      | 6.977545          |
| FAGelBrBr     | -58.5972 | 6.148017778      | 0                     | 1.8213582                     | 0.793425 | 2.614783005      | -0.44098946 | 1.044067 >1      | 6.822117          |
| FAGelBrI      | -58.3018 | 6.200341333      | 0                     | 1.51775647                    | 0.650702 | 2.168458496      | -0.43237971 | 1.034609 >1      | 6.479649          |
| FAGelIF       | -58.6574 | 6.200341333      | 0                     | 2.16183178                    | 1.035883 | 3.197714701      | -0.42349771 | 1.06268 >1       | 7.362096          |
| FAGelICI      | -58.194  | 6.200341333      | 0                     | 1.80949119                    | 0.830511 | 2.64000246       | -0.39942003 | 1.040457 >1      | 5.750087          |
| FAGelIBr      | -57.9977 | 6.200341333      | 0                     | 1.58733304                    | 0.725678 | 2.313011061      | -0.40703943 | 1.034609 >1      | 5.747486          |
| FAGelIII      | -57.7545 | 6.200341333      | 0                     | 1.29667869                    | 0.576427 | 1.873105843      | -0.40277381 | 1.025667 >1      | 5.778904          |

Table S1 All data of Ge-Based Compositions.

| configuration | Energy   | lattice_constant | Total_magnetic_moment | Eks(PBEsol) | Dxc      | Eks+Dxc(GLLB-sc) | formation E               | Tolerance Factor | Latticedistortion |
|---------------|----------|------------------|-----------------------|-------------|----------|------------------|---------------------------|------------------|-------------------|
| FASnFFF       |          |                  |                       |             |          |                  | did not converge in relax |                  |                   |
| FASnFFCI      |          |                  |                       |             |          |                  | did not converge in relax |                  |                   |
| FASnFFBr      |          |                  |                       |             |          |                  | did not converge in relax |                  |                   |
| FASnFFI       | -63.3397 | 6.095694222      | 0                     | 2.796484985 | 0.897833 | 3.694318439      | -0.7991013                | 1.021376 >1      | 17.70666 >15%     |
| FASnFCIF      | -63.3313 | 6.043370667      | 0                     | 3.904005899 | 1.72611  | 5.630115677      | -0.7584195                | 1.038471 >1      | 11.10101          |
| FASnFCICI     | -62.4809 | 6.095694222      | 0                     | 3.179275179 | 1.341551 | 4.520826216      | -0.7020885                | 1.015863 >1      | 14.54062          |
| FASnFCIBr     | -62.2177 | 6.095694222      | 0                     | 2.663128364 | 1.085993 | 3.749120961      | -0.7041308                | 1.009959 >1      | 11.07474          |
| FASnFCII      | -61.7941 | 6.095694222      | 0                     | 2.214570109 | 0.867329 | 3.08189928       | -0.6848337                | 1.000969 >1      | 13.99517          |
| FASnFBrF      | -62.8465 | 6.095694222      | 0                     | 3.422162213 | 1.404252 | 4.826413753      | -0.7419928                | 1.03168 >1       | 11.03922          |
| FASnFBrCl     | -62.1156 | 6.095694222      | 0                     | 2.707082494 | 1.084594 | 3.791676099      | -0.6956188                | 1.009959 >1      | 10.73873          |
| FASnFBrBr     | -61.8556 | 6.095694222      | 0                     | 2.295744709 | 0.914879 | 3.2106238        | -0.6979273                | 1.004277 >1      | 11.87268          |
| FASnFBrI      | -61.3439 | 6.095694222      | 0                     | 1.538847584 | 0.606329 | 2.145177056      | -0.6712896                | 0.995617         | 11.19328          |
| FASnFIF       | -62.0876 | 6.095694222      | 0                     | 2.211521637 | 0.921528 | 3.133050004      | -0.6947546                | 1.021376 >1      | 6.539767          |
| FASnFICI      | -61.3316 | 6.200341333      | 0                     | 2.142139404 | 0.864688 | 3.006827088      | -0.6462979                | 1.000969 >1      | 10.76809          |
| FASnFIBr      | -61.0647 | 6.200341333      | 0                     | 1.897304447 | 0.807632 | 2.704936405      | -0.6480268                | 0.995617         | 11.98395          |
| FASnFI        | -60.6377 | 6.252664889      | 0                     | 1.412748115 | 0.564465 | 1.977213512      | -0.6284519                | 0.987446         | 9.649109          |
| FASnCIFF      | -63.711  | 6.043370667      | 0                     | 3.748583149 | 1.711437 | 5.460020496      | -0.7900591                | 1.038471 >1      | 28.60511 >15%     |
| FASnCIFFCI    | -62.6795 | 6.095694222      | 0                     | 3.221860508 | 1.328156 | 4.550016499      | -0.7186434                | 1.015863 >1      | 17.74063 >15%     |
| FASnCIFBr     | -62.3706 | 6.095694222      | 0                     | 2.843004523 | 1.150968 | 3.993972496      | -0.7168684                | 1.009959 >1      | 17.70107 >15%     |
| FASnCIF       | -61.8988 | 6.095694222      | 0                     | 2.758550698 | 1.098625 | 3.857175939      | -0.6935599                | 1.000969 >1      | 18.01852 >15%     |
| FASnCIFFCI    | -61.4775 | 6.095694222      | 0                     | 3.359486333 | 1.506792 | 4.866278009      | -0.6184714                | 1.015863 >1      | 11.45173          |
| FASnCIFFCI    | -60.8377 | 6.148017778      | 0                     | 2.837594395 | 1.208626 | 4.046220797      | -0.5796905                | 0.996143         | 15.1265 >15%      |
| FASnCIFFBr    | -60.5246 | 6.148017778      | 0                     | 2.443767832 | 1.024268 | 3.468036229      | -0.5775769                | 0.990963         | 15.10767 >15%     |
| FASnCIFFI     | -60.052  | 6.200341333      | 0                     | 1.805152304 | 0.734284 | 2.539436636      | -0.5541945                | 0.983051         | 14.20163          |
| FASnCIFFBr    | -60.9064 | 6.095694222      | 0                     | 2.689304102 | 1.114878 | 3.804182079      | -0.5948568                | 1.009959 >1      | 5.495062          |
| FASnCIFFCl    | -60.2371 | 6.148017778      | 0                     | 2.512334349 | 1.082382 | 3.594716506      | -0.5536149                | 0.990963         | 7.570508          |
| FASnCIFFBr    | -59.9408 | 6.148017778      | 0                     | 2.011317391 | 0.845861 | 2.857178651      | -0.5528981                | 0.985966         | 6.695302          |
| FASnCIFFI     | -59.4911 | 6.200341333      | 0                     | 1.532140784 | 0.624819 | 2.156959357      | -0.5314293                | 0.978326         | 6.540497          |
| FASnCIFF      | -60.1765 | 6.200341333      | 0                     | 2.166462771 | 0.905737 | 3.072199923      | -0.5500351                | 1.000969 >1      | 6.108568          |
| FASnCIFFCI    | -59.6105 | 6.200341333      | 0                     | 1.746549878 | 0.715066 | 2.461616264      | -0.517409                 | 0.983051         | 5.366914          |
| FASnCIFFBr    | -59.3412 | 6.200341333      | 0                     | 1.465424955 | 0.613519 | 2.078943604      | -0.5189426                | 0.978326         | 5.29532           |
| FASnCIFFI     | -58.9486 | 6.252664889      | 0                     | 1.112867645 | 0.454445 | 1.567312621      | -0.5022301                | 0.971093         | 5.462664          |
| FASnBrFF      | -62.8187 | 6.095694222      | 0                     | 3.303181637 | 1.439046 | 4.742228051      | -0.7396771                | 1.03168 >1       | 14.74213          |
| FASnBrFFCI    | -62.2598 | 6.095694222      | 0                     | 2.851376182 | 1.176332 | 4.027708605      | -0.7076368                | 1.009959 >1      | 15.07645 >15%     |
| FASnBrFFBr    | -62.0239 | 6.095694222      | 0                     | 2.557725401 | 1.042972 | 3.600697162      | -0.7119558                | 1.004277 >1      | 20.26157 >15%     |
| FASnBrFI      | -61.3042 | 6.095694222      | 0                     | 1.792857377 | 0.700705 | 2.493562841      | -0.6679875                | 0.995617         | 11.74618          |
| FASnBrCIF     | -60.9432 | 6.095694222      | 0                     | 2.82244515  | 1.254083 | 4.076528123      | -0.5979187                | 1.009959 >1      | 7.354317          |
| FASnBrCICI    | -60.2413 | 6.148017778      | 0                     | 2.431471649 | 1.038176 | 3.469648078      | -0.5539689                | 0.990963         | 8.5824            |
| FASnBrCIBr    | -59.9543 | 6.148017778      | 0                     | 2.079734755 | 0.873738 | 2.953472592      | -0.5540217                | 0.985966         | 8.585714          |
| FASnBrCII     | -59.4993 | 6.200341333      | 0                     | 1.616929665 | 0.660381 | 2.277310299      | -0.5321147                | 0.978326         | 8.523699          |
| FASnBrBrF     | -60.4277 | 6.095694222      | 0                     | 2.390092815 | 0.999152 | 3.389244914      | -0.5789424                | 1.004277 >1      | 5.004539          |
| FASnBrBrCl    | -59.7476 | 6.148017778      | 0                     | 2.126086322 | 0.913912 | 3.039998097      | -0.5367972                | 0.985966         | 6.198079          |
| FASnBrBrBr    | -59.4249 | 6.200341333      | 0                     | 1.834965866 | 0.782608 | 2.617574161      | -0.5338807                | 0.981141         | 6.082687          |
| FASnBrBrI     | -59.0359 | 6.200341333      | 0                     | 1.354666739 | 0.556857 | 1.911523482      | -0.5174704                | 0.97376          | 5.972849          |
| FASnBrIF      | -59.6786 | 6.200341333      | 0                     | 1.925643057 | 0.809081 | 2.734723884      | -0.5325186                | 0.995617         | 4.926018          |
| FASnBrICI     | -59.1414 | 6.200341333      | 0                     | 1.554606943 | 0.641506 | 2.196113026      | -0.5022859                | 0.978326         | 5.122774          |
| FASnBrIBr     | -58.8538 | 6.252664889      | 0                     | 1.403950199 | 0.604271 | 2.008221697      | -0.5022947                | 0.97376          | 4.857627          |
| FASnBrII      | -58.5052 | 6.252664889      | 0                     | 0.993725097 | 0.410131 | 1.403855754      | -0.48925                  | 0.966766         | 5.319455          |
| FASnIFF       | -62.3316 | 6.095694222      | 0                     | 2.228380425 | 0.926666 | 3.155046215      | -0.7150899                | 1.021376 >1      | 14.51015          |
| FASnIFCI      | -61.7392 | 6.095694222      | 0                     | 1.93382557  | 0.806543 | 2.740368407      | -0.680263                 | 1.000969 >1      | 14.81894          |
| FASnIFBr      | -61.2979 | 6.095694222      | 0                     | 1.664661292 | 0.682084 | 2.346744891      | -0.6674633                | 0.995617         | 12.12658          |
| FASnIFI       | -60.8587 | 6.200341333      | 0                     | 1.605889931 | 0.652393 | 2.258283281      | -0.6468678                | 0.987446         | 19.36131 >15%     |
| FASnICIF      | -60.2456 | 6.148017778      | 0                     | 1.946220172 | 0.821478 | 2.767698215      | -0.5557909                | 1.000969 >1      | 8.124101          |
| FASnICICI     | -59.6342 | 6.200341333      | 0                     | 1.680067128 | 0.723086 | 2.403153033      | -0.5193786                | 0.983051         | 7.818692          |
| FASnICIBr     | -59.3696 | 6.200341333      | 0                     | 1.450725791 | 0.619241 | 2.069967062      | -0.5213017                | 0.978326         | 8.142846          |
| FASnICII      | -58.9448 | 6.252664889      | 0                     | 1.076531491 | 0.448155 | 1.52468626       | -0.5019096                | 0.971093         | 5.916082          |
| FASnIBrF      | -59.6846 | 6.200341333      | 0                     | 1.877730466 | 0.830904 | 2.708634141      | -0.5330169                | 0.995617         | 5.985121          |
| FASnIBrCl     | -59.1509 | 6.200341333      | 0                     | 1.483853993 | 0.646949 | 2.130802497      | -0.5030804                | 0.978326         | 5.304787          |
| FASnIBrBr     | -58.85   | 6.252664889      | 0                     | 1.347105996 | 0.585806 | 1.932912363      | -0.5019838                | 0.97376          | 5.024615          |
| FASnIBrI      | -58.4951 | 6.252664889      | 0                     | 0.991526107 | 0.417547 | 1.409073273      | -0.4884074                | 0.966766         | 4.817196          |
| FASnIIF       | -59.0877 | 6.252664889      | 0                     | 1.407621515 | 0.601323 | 2.008944542      | -0.499279                 | 0.987446         | 4.768948          |
| FASnIICI      | -58.587  | 6.252664889      | 0                     | 1.152155388 | 0.486957 | 1.639112873      | -0.4720915                | 0.971093         | 4.990533          |
| FASnIIBr      | -58.3512 | 6.252664889      | 0                     | 0.910849889 | 0.407744 | 1.318593716      | -0.476415                 | 0.966766         | 4.877112          |
| FASnIII       | -57.9966 | 6.304988444      | 0                     | 0.710628399 | 0.302548 | 1.013176752      | -0.46287                  | 0.960129         | 4.790317          |

Table S2 All data of Sn-Based Compositions.

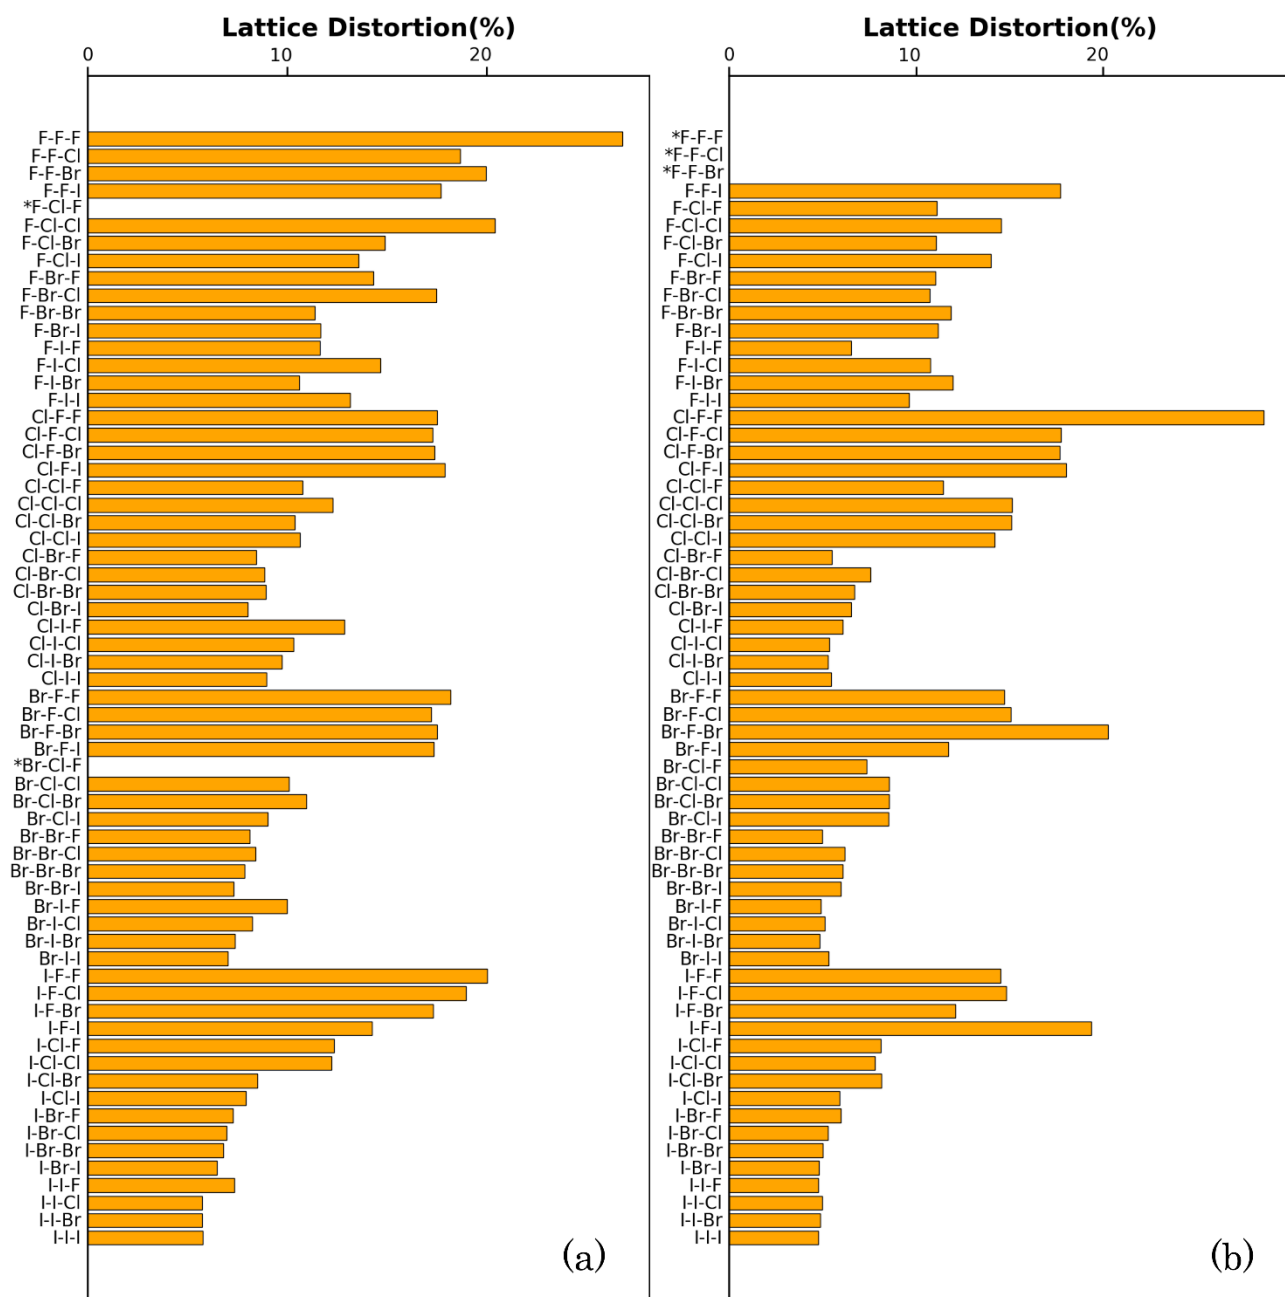

Figure S3 (a)Lattice distortion of Ge-Based Compositions (b)Lattice distortion of Sn-Based Compositions. Composition with \* has no data due to convergence errors.
